# Supplementary material for: Floc density-driven bacterial community succession orchestrates antibiotic resistance dissemination in activated sludge
Source: Royal Society of Chemistry journal article supplement (doi:10.1039/d5ew00515a), 2026-01-01
Supplement: d5ew00515a1.pdf [file d5ew00515a1.pdf]

**Floc Density-Driven Bacterial Community Succession Orchestrates Antibiotic  
Resistance Dissemination in Activated Sludge**

Yulong Ding<sup>1#</sup>, Ke Wang<sup>1#</sup>, Chenxin Zhang<sup>1</sup>, Gang Wang<sup>2</sup>, Li Liu<sup>1</sup>, Guowei Chen<sup>1,\*</sup>

<sup>1</sup> Department of Civil Engineering, Hefei University of Technology, Hefei 230009,  
China

<sup>2</sup> Department of Soil and Water Sciences, China Agricultural University, Beijing  
100193, China

\*Correspondences Guowei Chen, [gwchen@hfut.edu.cn](mailto:gwchen@hfut.edu.cn), ORCID, 0000-0002-3093-  
9866

**Table S1** Density (g/mL) of sucrose solution under various concentration and temperature conditions

| Sucrose<br>(%, w/V) | 0°C     | 10°C    | 15°C    | 20°C    | 25°C    | 30°C    |
|---------------------|---------|---------|---------|---------|---------|---------|
| 0                   | 0.99987 | 0.99973 | 0.99913 | 0.99823 | 0.99707 | 0.99567 |
| 5                   | 1.02033 | 1.0196  | 1.01884 | 1.01785 | 1.01661 | 1.01518 |
| 10                  | 1.04135 | 1.0416  | 1.03925 | 1.03814 | 1.03679 | 1.0353  |
| 15                  | 1.06304 | 1.06146 | 1.06041 | 1.05917 | 1.05772 | 1.05612 |
| 20                  | 1.08546 | 1.08353 | 1.08233 | 1.08096 | 1.0794  | 1.07767 |
| 25                  | 1.13274 | 1.10642 | 1.10507 | 1.10356 | 1.10188 | 1.10005 |
| 30                  | 1.15769 | 1.13014 | 1.12863 | 1.12698 | 1.12517 | 1.12324 |

**Table S2** Primer information corresponding to the measured gene fragment

| Gene          | Primer | Sequence (5'-3')           | Amplicon size (bp) | Annealing Temperature (°C) |
|---------------|--------|----------------------------|--------------------|----------------------------|
| 16S rRNA      | FW     | CCTACGGGAGGCAGCAG          | 193                | 60                         |
|               | RV     | TTACCGCGGCTGCTGGCAC        |                    |                            |
| <i>intl 1</i> | FW     | GAGGCATTTCTGTCCTGGCT       | 280                | 60                         |
|               | RV     | GCAGTTGCAAACCCTCACTG       |                    |                            |
| <i>qnr B</i>  | FW     | CTTCACACATTGCGATCTGAC      | —                  | —                          |
|               | RV     | CAACGATGCCTGGTAGTTGT       |                    |                            |
| <i>qnr S</i>  | FW     | GATATCGAAGGTGCCACTT        | —                  | —                          |
|               | RV     | CACGGAACTCTATACCGTAGC<br>A |                    |                            |
| <i>tet A</i>  | FW     | GCTACATCCTGCTTGCCTTC       | 210                | 60                         |
|               | RV     | CATAGATCGCCGTGAAGAGG       |                    |                            |
| <i>tet W</i>  | FW     | GAGAGCCTGCTATATGCCAGC      | 168                | 60                         |
|               | RV     | GGGCGTATCCACAATGTTAAC      |                    |                            |
| <i>sul 1</i>  | FW     | CACCGGAAACATCGCTGCA        | 158                | 60                         |
|               | RV     | AAGTTCCGCCGCAAGGCT         |                    |                            |
| <i>sul 2</i>  | FW     | TCCGGTGGAGGCCGGTATCTG<br>G | 191                | 55                         |
|               | RV     | CGGGAATGCCATCTGCCTTGA<br>G |                    |                            |

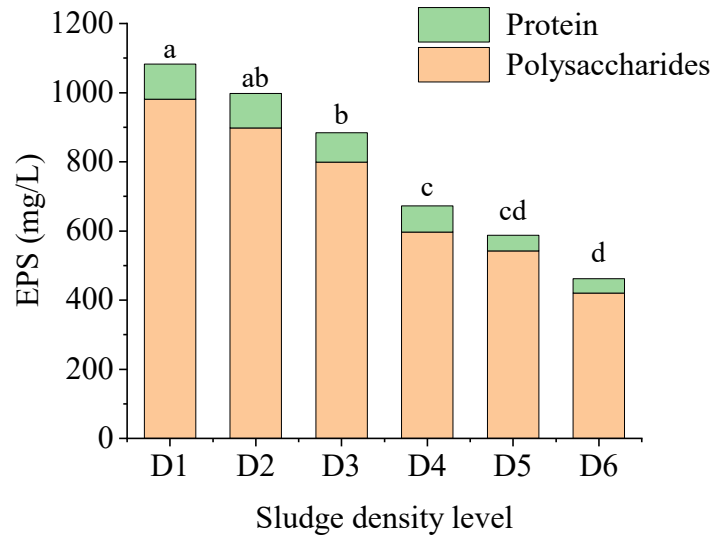

**Fig. S1** Extracellular polymeric substances (EPS) concentrations across sludge flocs of varying densities. Different letters indicate significant differences among groups ( $p < 0.05$ ). EPS was extracted using a modified heat method and quantified using the Folin–phenol (protein, 750 nm) and anthrone (polysaccharide, 625 nm) assays.
